# Supplementary material for: Degradation and detection of organophosphorus pesticides based on peptides and MXene–peptide composite materials
Source: Royal Society of Chemistry journal article supplement (doi:10.1039/d4an00674g), 2024-01-01
Supplement: d4an00674g1.pdf [file d4an00674g1.pdf]

## Supplementary Material

### Degradation and detection of organophosphorus pesticides based on peptides and MXene-peptide composite materials

Qiuying Wang<sup>1a</sup>, Ruiqing Jiu<sup>1a</sup>, Yunyao Wang<sup>a</sup>, Zongda Li<sup>a</sup>, Jianan Chen<sup>a</sup>, Haochi Liu<sup>a</sup>, Jifeng Liu<sup>\*a</sup>, Jia Cao<sup>b</sup>

*a: State Key Laboratory of Food Nutrition and Safety, Key Laboratory of Food Quality and Healthy of Tianjin, College of Food Science and Engineering, Tianjin University of Science and Technology, Tianjin 300457, PR China*

*b: Tianjin Vocational College of Bioengineering*

*\*Corresponding author: Jifeng Liu, liujifeng111@gmail.com*

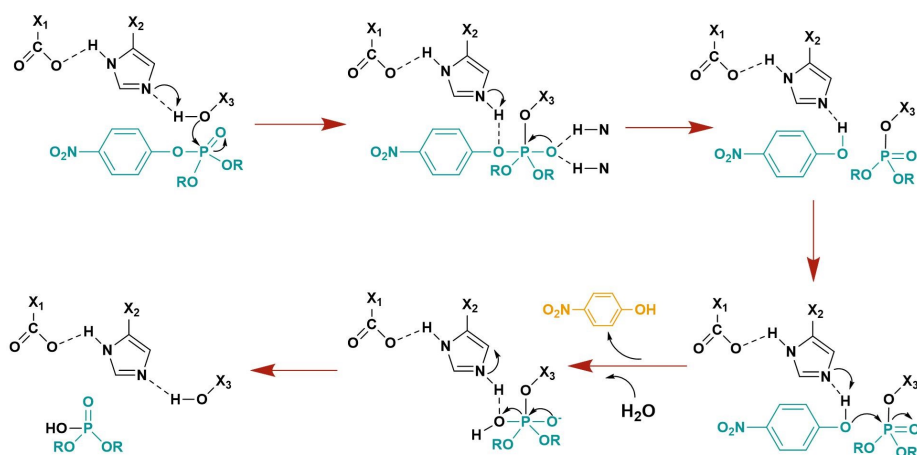

**Scheme S1** Mechanism of OPs hydrolysis catalyzed by enzyme. X<sub>1</sub>, X<sub>2</sub>, and X<sub>3</sub> represent acids, bases, and nucleophiles, respectively.

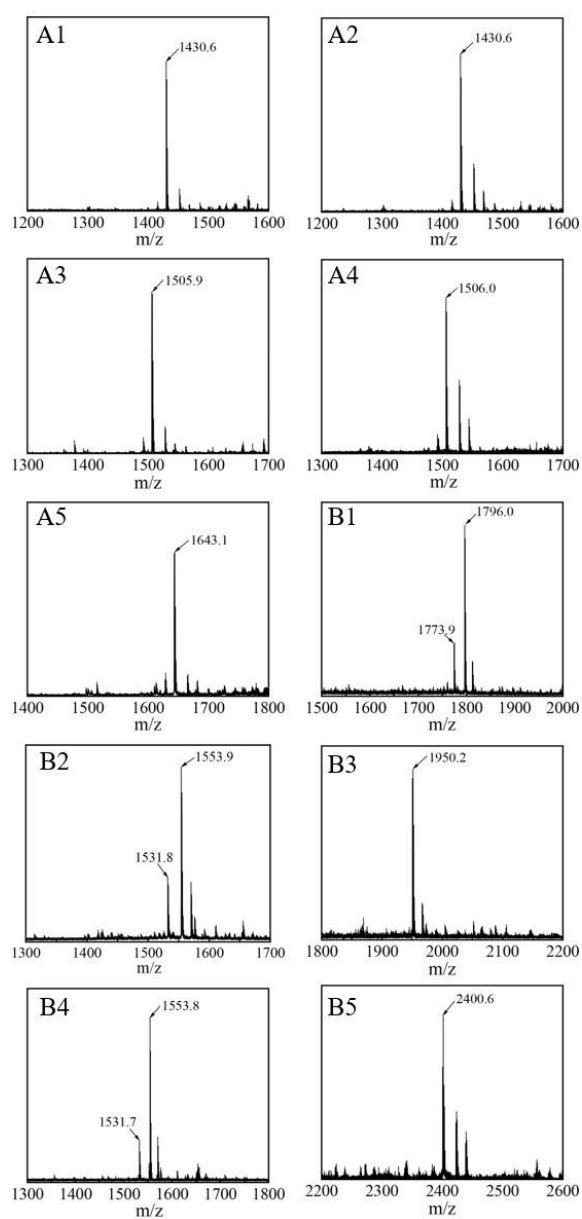

**Fig. S1** Mass spectrum of peptides.

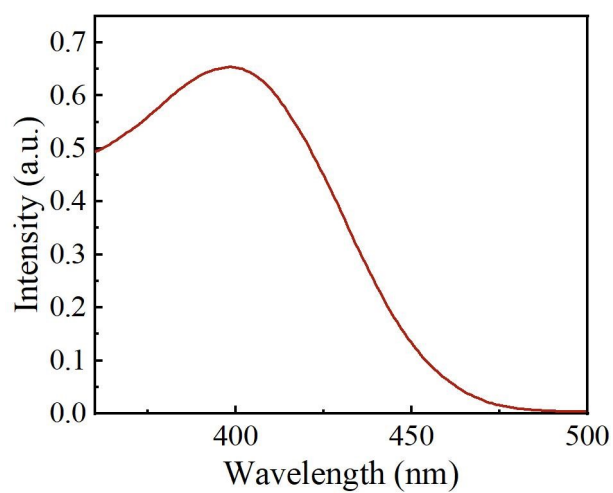

**Fig. S2** UV-vis absorbance spectra of PNP ([PNP] = 0.1 mM).

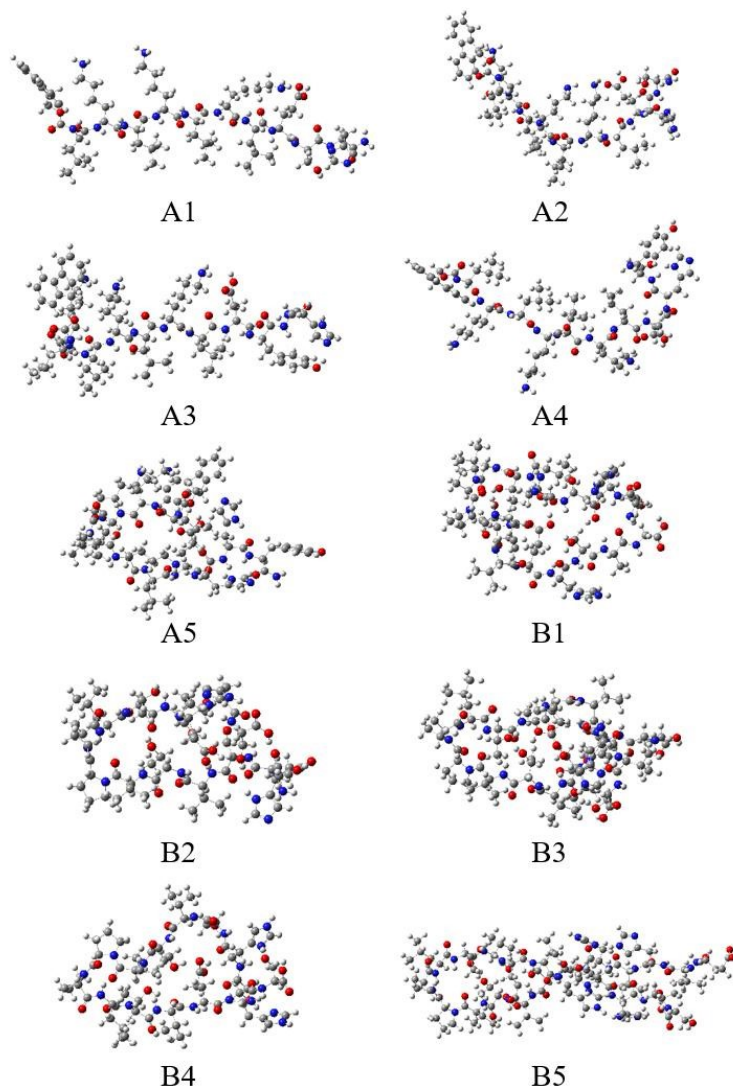

**Fig. S3** Geometric configuration of peptides (carbon atoms: gray; nitrogen atoms: blue; oxygen atoms: red; hydrogen atoms: white).

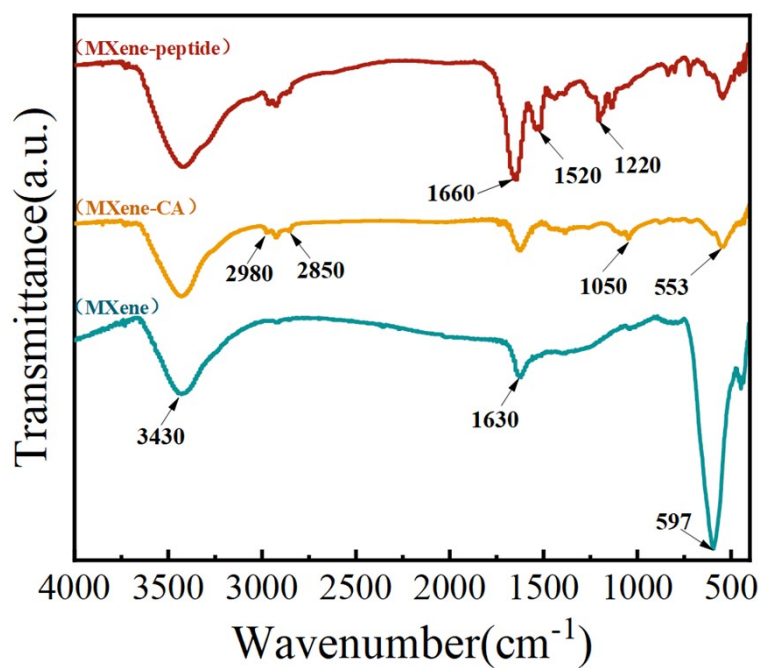

Fig. S4. The ATR-FTIR spectra of MXene, MXene-CA and MXene-peptide.

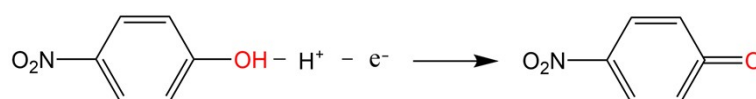

Fig. S5 The oxidation of PNP.

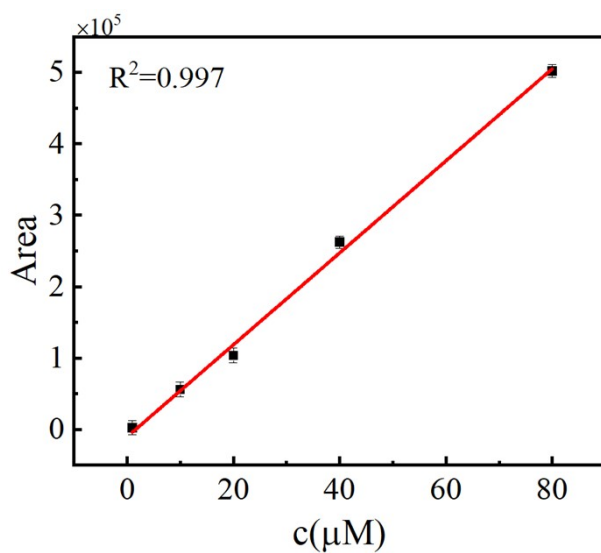

Fig. S6 The standard curve of gas chromatography-mass spectrometry of OPs.

**Table S1** Compared to other detection methods

| Determinative method                                        | LOD                | Linear range          | RSD   | Detection time |
|-------------------------------------------------------------|--------------------|-----------------------|-------|----------------|
| MXene-peptide electrochemical detection (this work)         | 0.15 $\mu\text{M}$ | 1-100 $\mu\text{M}$   | 4.71% | 15 min         |
| Roll-to-Roll manufactured sensors <sup>1</sup>              | 1 $\mu\text{M}$    | 1-20 $\mu\text{M}$    | <10%  | 10 min         |
| Fluorescent peptide probes <sup>2</sup>                     | 0.6 $\mu\text{M}$  | 1-100 $\mu\text{M}$   | <2%   | 15 min         |
| Colourimetric sensing platform <sup>3</sup>                 | 0.39 $\mu\text{M}$ | 0.5-50 $\mu\text{M}$  | -     | 2 min          |
| Electrochemical detection based on amino acids <sup>4</sup> | 0.24 $\mu\text{M}$ | 0.5-100 $\mu\text{M}$ | 2.3%  | 15 min         |
| Multi-enzyme/CNT biosensor <sup>5</sup>                     | 0.50 $\mu\text{M}$ | 0.5-40 $\mu\text{M}$  | 3.6%  | >15 min        |

**Table S2** Analysis of OPs in real samples.

| Sample       | OPs             | Additive amount ( $\mu\text{M}$ ) | Initial value | GC-MS                           |             | Electrochemical analysis |                                 |             |                 |
|--------------|-----------------|-----------------------------------|---------------|---------------------------------|-------------|--------------------------|---------------------------------|-------------|-----------------|
|              |                 |                                   |               | Average value ( $\mu\text{M}$ ) | Recovery(%) | RS D (%)<br>n=3          | Average value ( $\mu\text{M}$ ) | Recovery(%) | RS D (%)<br>n=3 |
| Oilseed rape | methyl paraoxon | 5.00                              | 0             | 4.47                            | 85.59       | 3.66                     | 4.10                            | 82.00       | 4.71            |
|              |                 | 20.00                             | 0             | 17.68                           | 87.58       | 3.45                     | 17.66                           | 88.30       | 4.43            |
|              |                 | 40.00                             | 0             | 32.34                           | 77.72       | 4.09                     | 35.64                           | 89.10       | 4.30            |
| Bokchoy      | methyl paraoxon | 5.00                              | 0             | 4.08                            | 74.65       | 4.32                     | 3.84                            | 76.80       | 4.15            |
|              |                 | 20.00                             | 0             | 17.28                           | 85.41       | 3.93                     | 16.87                           | 84.35       | 3.54            |
|              |                 | 40.00                             | 0             | 32.51                           | 78.17       | 4.21                     | 35.38                           | 88.45       | 2.95            |

## References

1. A. M. Ulloa, N. Glassmaker, M. R. Oduncu, P. Xu, A. Wei, M. Cakmak and L. Stanciu, *ACS Applied Materials & Interfaces*, 2021, **13**, 35961-35971.
2. J. Wang, J. Zhang, J. Wang, G. Fang, J. Liu and S. Wang, *Journal of Hazardous Materials*, 2020, **389**, 122074.
3. C.-L. Yang, L.-H. Yu, Y.-H. Pang and X.-F. Shen, *Analytica Chimica Acta*, 2024, **1286**, 342045.
4. Y. Liu, X. Cao, Z. Liu, L. Sun, G. Fang, J. Liu and S. Wang, *Analyst*, 2021, **145**, 8068-8076.
5. Y. Zhang, M. A. Arugula, M. Wales, J. Wild and A. L. Simonian, *Biosensors and Bioelectronics*, 2015, **67**, 287-295.
